# Supplementary material
Source: PubMed Central journal article supplement (PMC11614147)
Supplement: NIHMS2014269-supplement-M21-3798_Supplement.pdf [file NIHMS2014269-supplement-M21-3798_Supplement.pdf]

## Supplementary Material\*

Rosenblum HG, Lewis RM, Gargano JW, et al. Human papillomavirus vaccine impact and effectiveness through 12 years after vaccine introduction in the United States, 2003 to 2018. *Ann Intern Med.* 17 May 2022. [Epub ahead of print]. doi:10.7326/M21-3798

Supplement Figure 1: Participation and sample collection among females, National Health and Nutrition Examination Survey, 2003–2018

Supplement Figure 2: Participation and sample collection among males, National Health and Nutrition Examination Survey, 2011–2018

Supplement Table 1: Characteristics of sexually experienced males aged 14–24 years, overall and by HPV vaccination history, 2013–2016

Supplement Table 2: Human papillomavirus (HPV) prevalence and prevalence ratios, sexually experienced males aged 14–24 years overall and by vaccination history, 2013–2016

\* This supplementary material was provided by the authors to give readers further details on their article. The material was not copyedited.

Supplement Figure 1: Participation and sample collection among females, National Health and Nutrition Examination Survey, 2003–2018

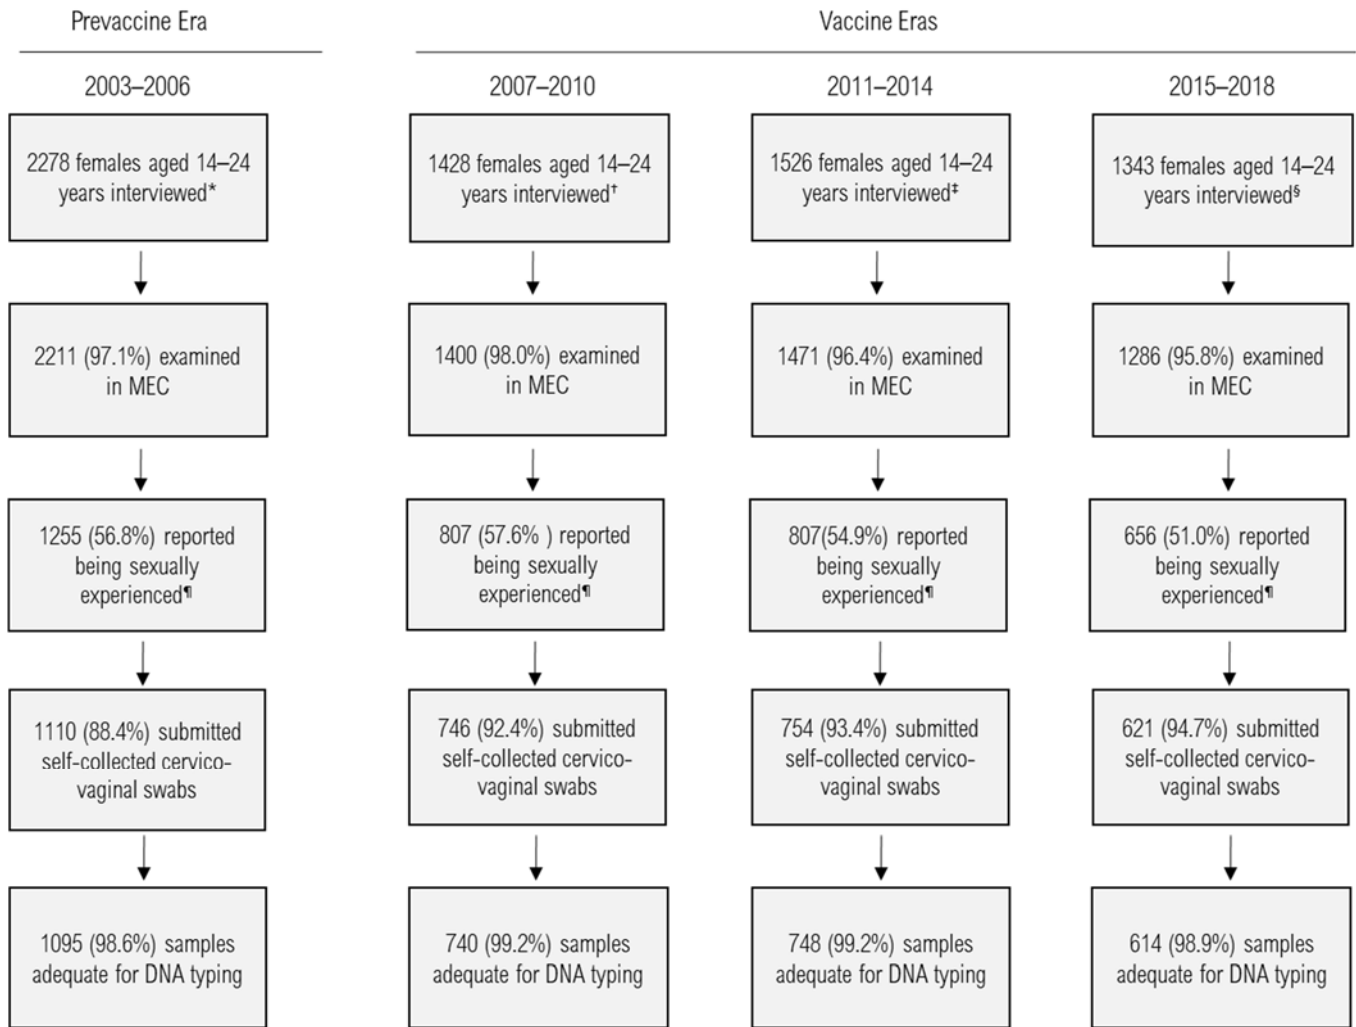

\*The response rate during 2003–2004 and 2005–2006 was 80.0% and 80.9% for the interview portion and 76.0% and 77.8% for the examination portion, respectively

†The response rate during 2007–2008 and 2009–2010 among females 78.6% and 79.7% for the interview portion and 75.5% and 77.4% for the examination portion, respectively

‡The response rate during 2011–2012 and 2013–2014 among females was 72.6% and 71.4% for the interview portion and 69.4% and 68.8% for the examination portion, respectively

§The response rate during 2015–2016 and 2017–2018 among females was 62.6% and 53.5% for the interview portion and 60.0% and 50.5% for the examination portion, respectively

¶Information about sexual experience history available for 1986 females 2003–2006, 1248 for 2007–2010, 1370 for 2011–2014 and 1191 in 2015–2018

Supplement Figure 2: Participation and sample collection among males, National Health and Nutrition Examination Survey, 2011–2018

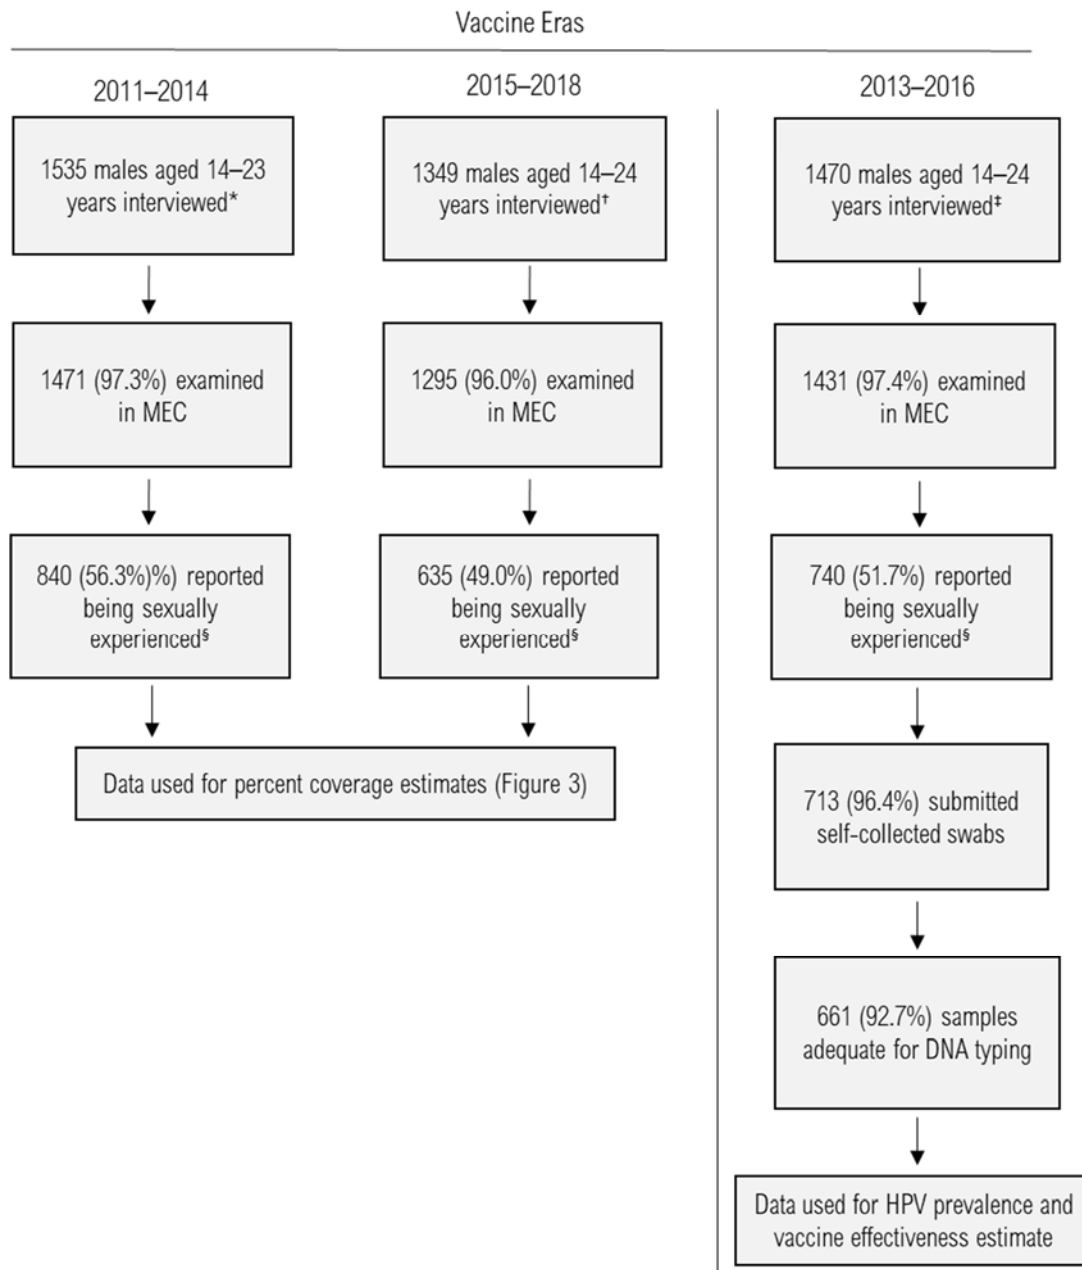

\*The response rate during 2011–2012 and 2013–2014 among males was 72.7% and 70.6% for the interview portion and 69.6% and 68.1% for the examination portion, respectively

†The response rate during 2015–2016 and 2017–2018 among males was 60.1% and 50.3% for the interview portion and 57.4% and 47.2% for the examination portion, respectively

‡The response rate during 2013–2014 and 2015–2016 among males was 70.6% and 60.1% for the interview portion and 68.1% and 57.4% for the examination portion, respectively

§Information about sexual experience history available for 1402 males 2011–2014, 1196 for 2015–2018 and 1339 in 2013–2016

Supplement Table 1: Characteristics of sexually experienced males aged 14–24 years, overall and by HPV vaccination history, 2013–2016

| Characteristic                  | % (95% CI)        |                     |                        |
|---------------------------------|-------------------|---------------------|------------------------|
|                                 | Overall<br>n= 661 | Vaccinated<br>n=124 | Unvaccinated<br>n= 431 |
| <b>HPV vaccination history</b>  |                   |                     |                        |
| ≥1 dose                         | 22.1 (18.5-26.3)  | -                   | -                      |
| Vaccination age <15*            | -                 | 30.4 (21.1-41.6)    | -                      |
| <b>≥3 lifetime sex partners</b> | 65.1 (60.7-69.3)  | 59.4 (49.7-68.4)    | 67.3 (60.7-73.3)       |
| <b>Race ethnicity</b>           |                   |                     |                        |
| Non-Hispanic White              | 53.6 (46.2-60.8)  | 59.8 (47.0-71.3)    | 52.6 (45.3-59.7)       |
| Non-Hispanic Black              | 15.6 (12.1-19.9)  | 14.5 (8.8-22.9)     | 16.2 (12.1-21.4)       |
| Mexican American                | 14.4 (10.6-19.3)  | 11.7 (7.0-19.1)     | 14.2 (10.1-19.6)       |
| Other races                     | 16.3 (12.7-20.7)  | 14.0 (8.4-22.4)     | 17.0 (12.8-22.1)       |
| <b>Below poverty</b>            | 22.7 (18.0-28.2)  | 17.7 (10.2-29.0)    | 25.4 (20.3-31.4)       |

\*Among those vaccinated; refers to age at first dose

HPV = Human papillomavirus; CI = confidence interval

Note: All estimates are weighted using NHANES examination weights

Supplement Table 2: Human papillomavirus (HPV) prevalence and prevalence ratios, sexually experienced males aged 14–24 years overall and by vaccination history, 2013–2016

| HPV types and vaccination history | Prevalence, % (95% CI)      | Prevalence ratio (95% CI) |
|-----------------------------------|-----------------------------|---------------------------|
| <b>4vHPV*</b>                     |                             |                           |
| Overall                           | 3.0 (1.8-4.9)               | -                         |
| Vaccinated                        | 1.8 (0.4-6.8) <sup>§</sup>  | 0.49 (0.11-2.20)          |
| Unvaccinated                      | 3.5 (1.9-6.4)               | Ref <sup>  </sup>         |
| <b>Non-4vHPV<sup>†</sup></b>      |                             |                           |
| Overall                           | 33.7 (29.7-37.9)            | -                         |
| Vaccinated                        | 30.7 (21.5-41.8)            | 0.89 (0.58-1.37)          |
| Unvaccinated                      | 34.3 (29.1-40.0)            | Ref <sup>  </sup>         |
| <b>HPV31, 33, 45</b>              |                             |                           |
| Overall                           | 3.1 (1.9-5.0)               | -                         |
| Vaccinated                        | 6.0 (1.5-21.0) <sup>§</sup> | 2.16 (0.37-12.50)         |
| Unvaccinated                      | 2.8 (1.4-5.5) <sup>±</sup>  | Ref <sup>  </sup>         |

\*4vHPV= quadrivalent HPV vaccine types, HPV6,11,16,18

<sup>†</sup>Non-4vHPV: 33 types detected using Linear Array that are not HPV6,11,16, or 18

<sup>±</sup>Relative standard error 30-50%

<sup>§</sup>Relative standard error >50%

<sup>||</sup>Reference

HPV = Human papillomavirus; CI = confidence interval

We use HPV nomenclature to be consistent with our past publications, however, nomenclature has evolved since the Roche product was launched. IS39 is a subtype of HPV82, HPV55 was reclassified as HPV44, and HPV64 was reclassified as HPV34

Note: All estimates are weighted using NHANES examination weights
